# Supplementary material
Source: publisher figshare collection journal article supplement (https://brill.figshare.com/ndownloader/files/37372588)
Supplement: Supplementary file 1 [file 37372588]

**Supplementary Material**


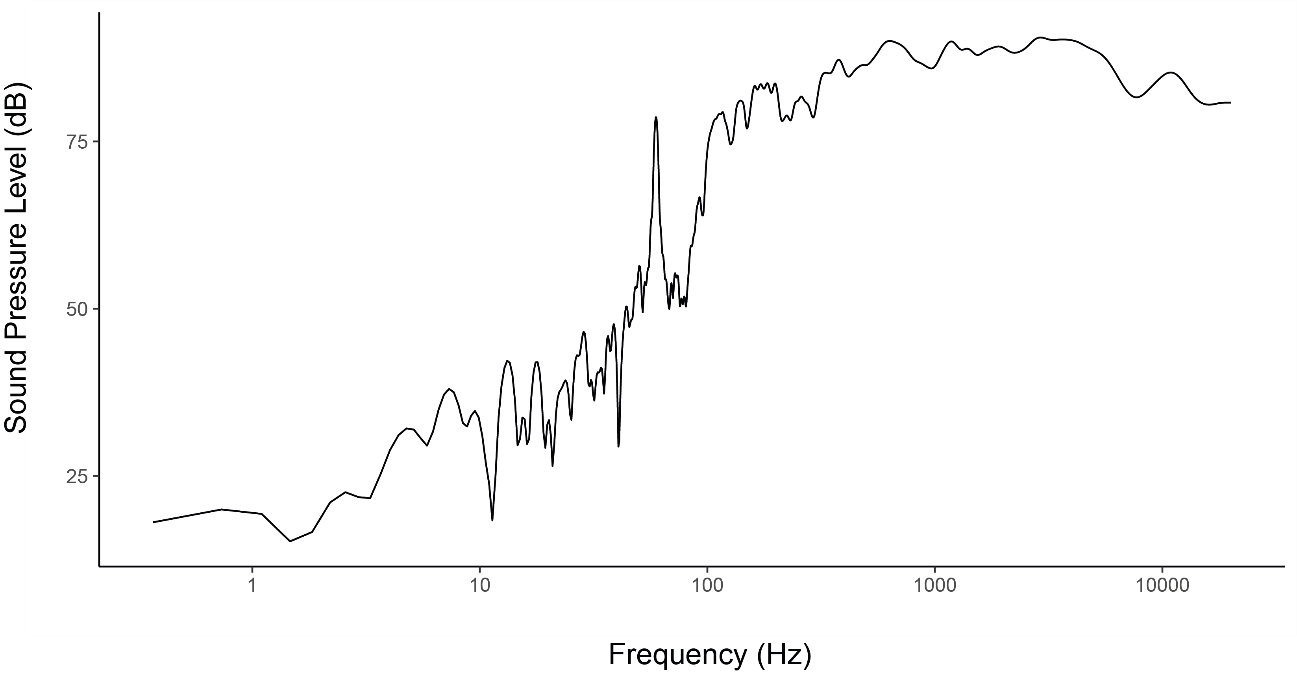


**Figure A1.** Frequency response of speakers used in the experiment (Frequency axis is in log scale).


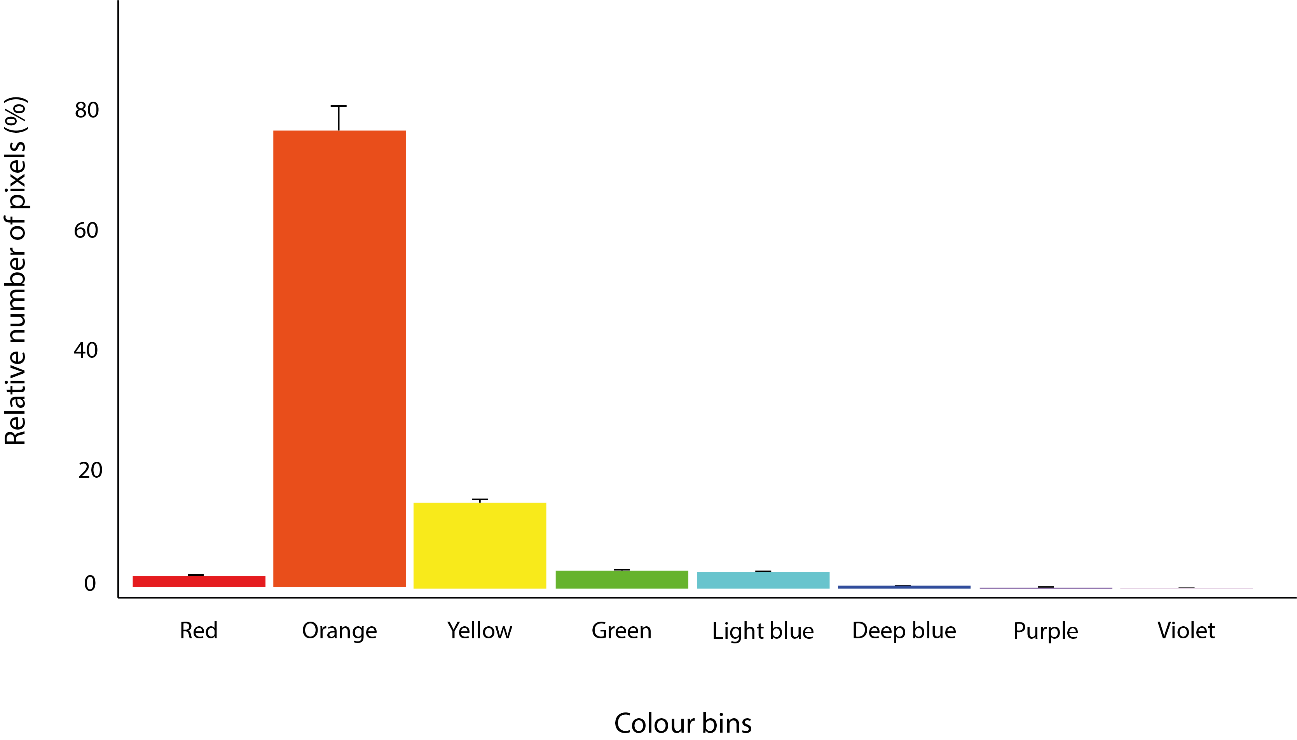


**Figure A2.** Average percentage of pixels in each colour bin of photographs with their respective 5% confidence interval.


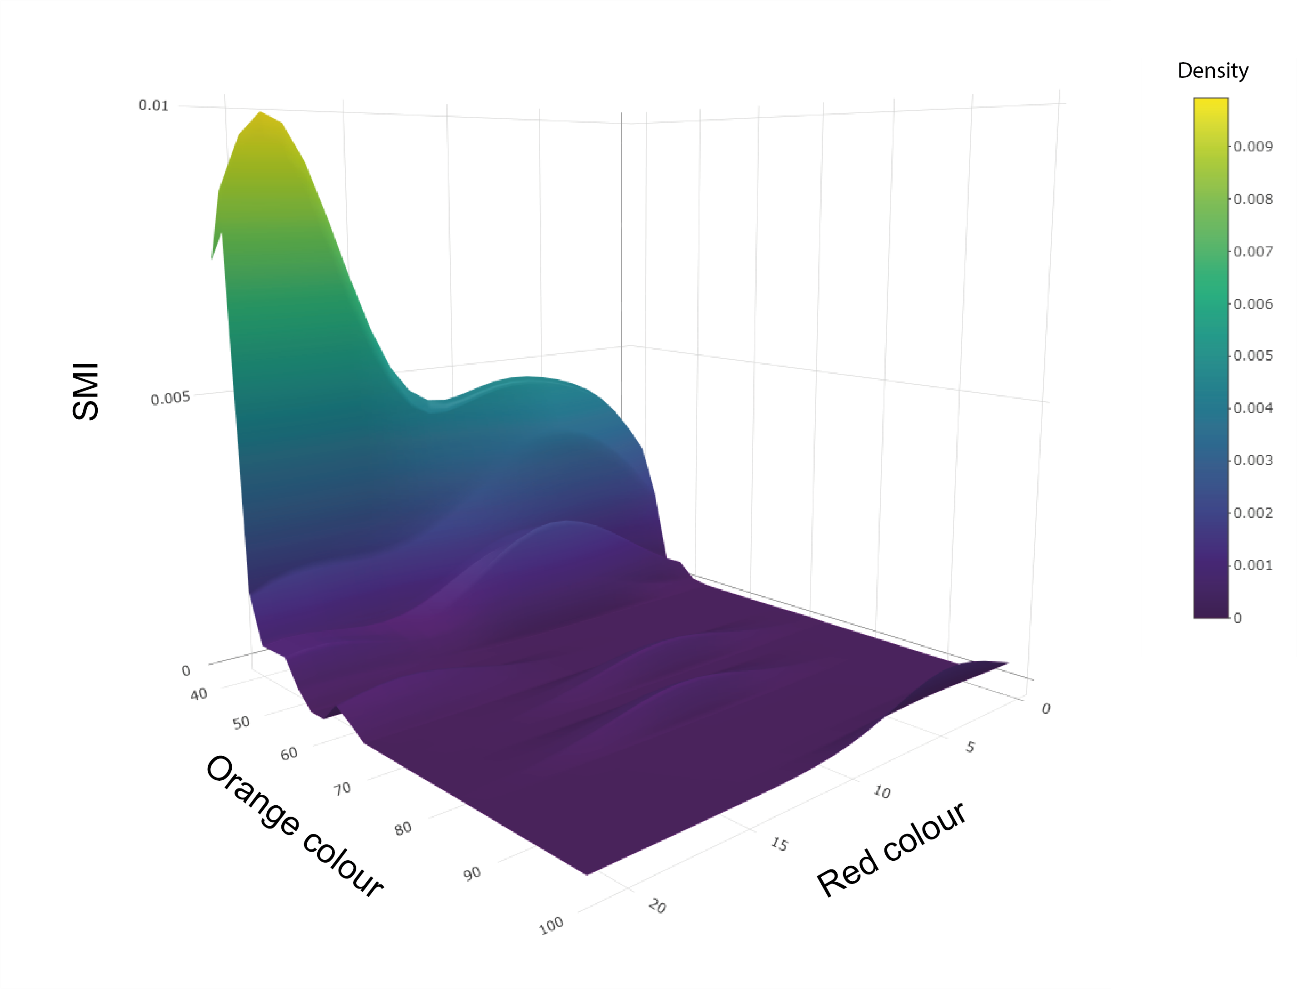


**Figure A3.** Density plot between Scaled Mass Index (SMI) and orange and red colours.
